# Supplementary material for: A multi-variant recall-by-genotype study of the metabolomic signature of body mass index
Source: bioRxiv or medRxiv preprint supplement (doi:10.1101/2021.10.21.465319), 2021-10-23

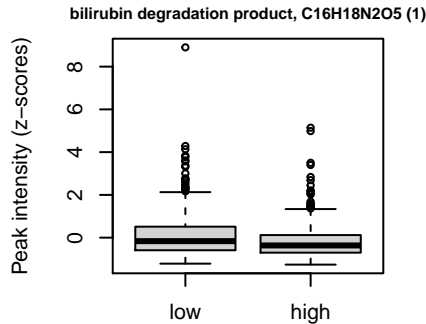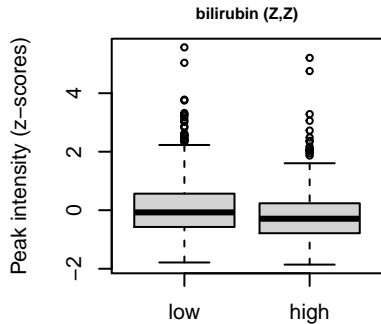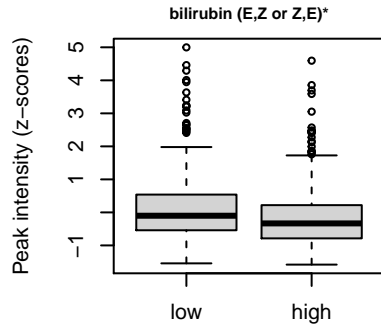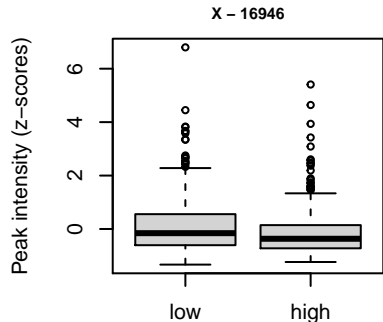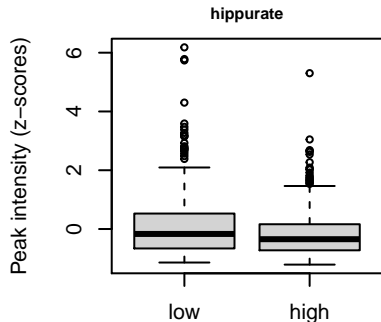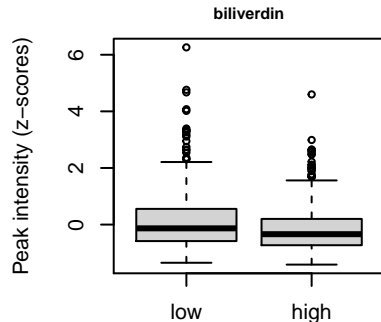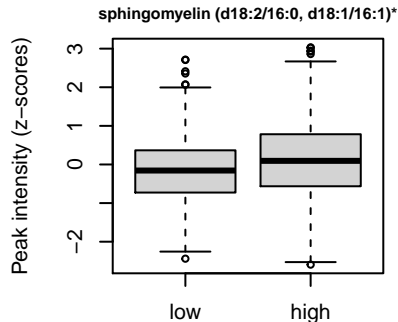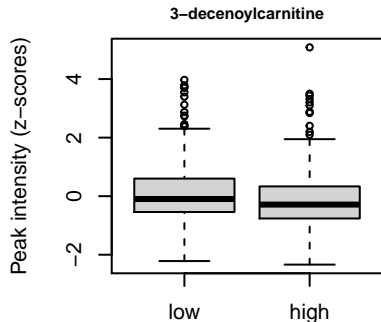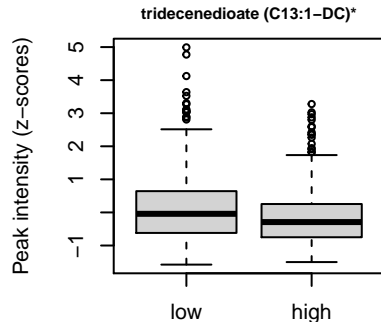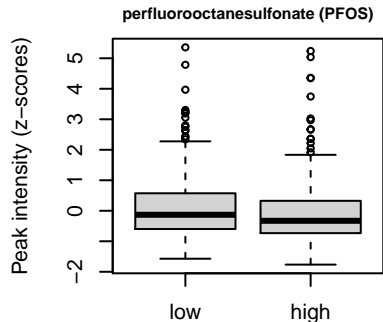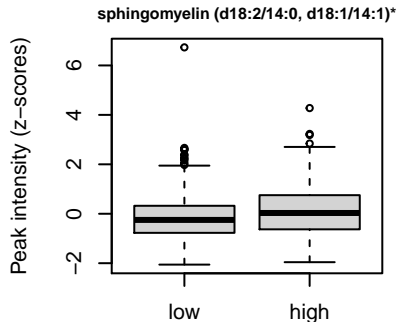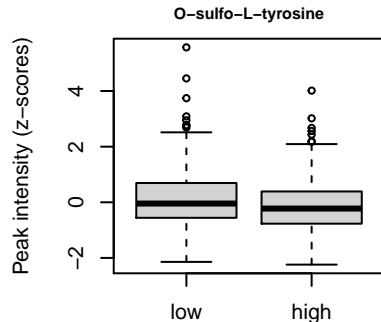

X - 11522

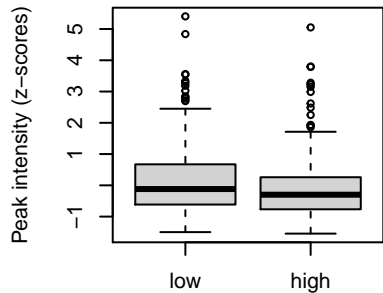

X - 11530

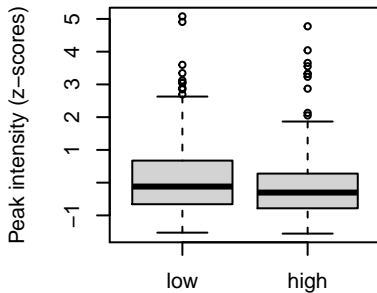

X - 24494

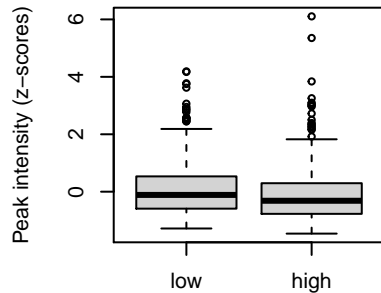

X - 24849

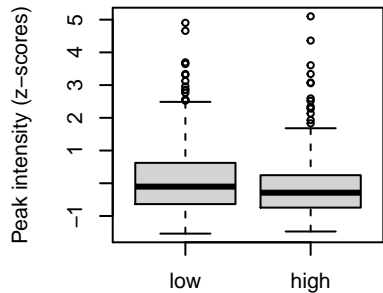

3-hydroxy-2-ethylpropionate

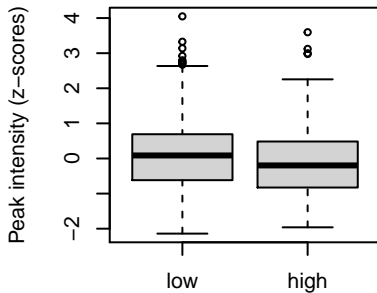

glycocholate sulfate\*

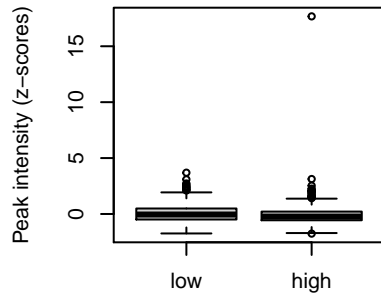

cortisone

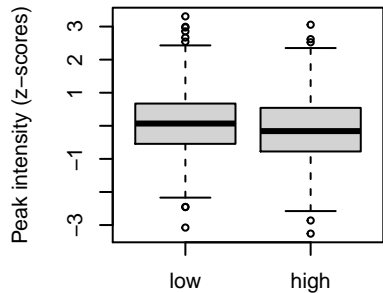

3-hydroxydecanoylcarnitine

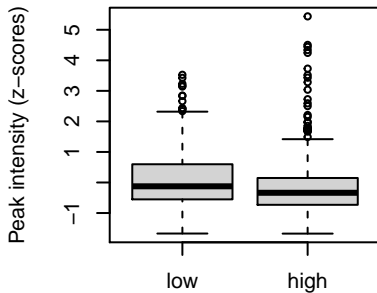

succinimide

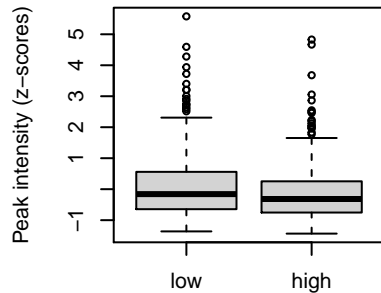

X - 11441

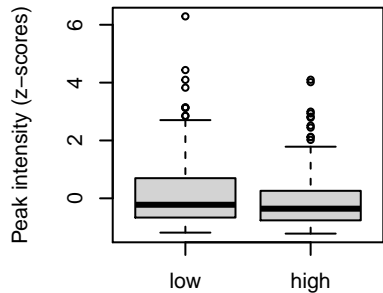

X - 12101

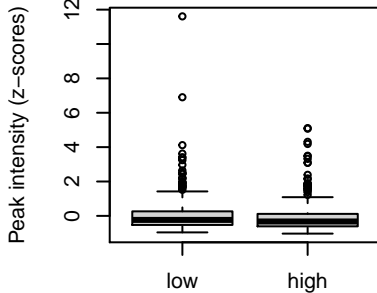

X - 11442

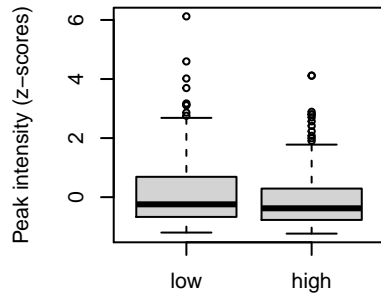

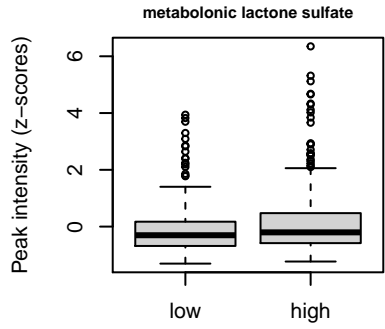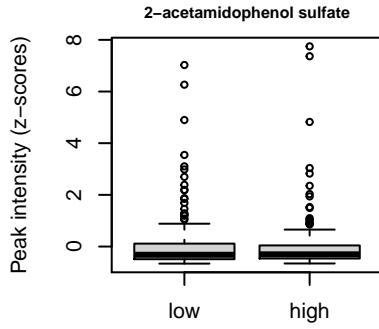

Supplement: Supplementary file [file media-2.pdf]
